# Supplementary material
Source: ML conference proceedings conference paper supplement (https://aclanthology.org/D18-1180)
Supplement: Attachment [file emnlp-2018-appendix.pdf › emnlp-2018-appendix.pdf]

# Appendix: Preposition Sense Disambiguation and Representation

## A Preposition Sense Representation

### A.1 Word similarity task

We learn preposition sense representations, and explore the semantic information they carry. A straightforward approach is to examine the nearest neighboring words, corresponding to each sense of each preposition. Our results on this exploration for two exemplar prepositions are here: *in* (Table 9) and *with* (Table 10). We enumerate senses for a preposition in each table, and also provide their closest words, TPP sense types and example sentences for each sense.

| sense number  | 1                                                                      | 2                                                               | 3                                                         | 4                                                  |
|---------------|------------------------------------------------------------------------|-----------------------------------------------------------------|-----------------------------------------------------------|----------------------------------------------------|
| closest words | backwards, reverse, angles, diagonal, between, forward                 | wearing, dress, hats, dresses, trousers, sleeves, pants, jacket | back, inside, underneath, from, into, where, onto         | where, near, from, at, southern, northern, during  |
| example       | in all directions, move in, differ in                                  | dress in black, in leather, in size                             | in the mail, in most cases, in confined space             | in military aircraft, in the UK, in Argentina      |
| TPP sense     | Manner_or_Degree                                                       | VariableQuality                                                 | ThingEntered                                              | ThingEnclosed                                      |
| sense number  | 5                                                                      | 6                                                               | 7                                                         | 8                                                  |
| closest words | until, during, subsequently, following, after, late, since             | university, graduate, college, teaching, faculty, school        | economic, systematic, growth, technological               | wearing, dressed, costume, wears, clothes, jacket  |
| example       | in 1978, in may 1993, in 2002, in the weeks                            | in a lecture, in graduate studies, in college                   | focus in science, growth in sales, vocals in her pieces   | in the costume, in the jacket, in a gown           |
| TPP sense     | Timeframe                                                              | ProfessionAspect                                                | Attribute                                                 | Garment                                            |
| sense number  | 9                                                                      | 10                                                              | 11                                                        | 12                                                 |
| closest words | explicitly, interpretation, discourse, fundamental, notion, principles | prosecutor, prosecution, criminal, judicial, justice            | onwards, for, wherein                                     | violent, betrayal, bloody, brutal, bitter, fearful |
| example       | in a diagram, in this process, in different ways, in the work          | in a constitution, in military justice, in court                | in computer graphics, in engineering projects, in the war | result in, in custody, involved in, participate in |
| TPP sense     | Medium                                                                 | Activity                                                        | FramingEntity                                             | Condition                                          |

Table 9: Senses of preposition “in”.

In Table 9, we notice that the nearest neighbors tend to be words semantically related to the given sense. For example, *until*, *during* and *since* are close to TimeFrame sense of *in*. The nearest words might also be the governors of a preposition. For example, when *in* carries the sense of Garment, verbs such as *dressed* are close to it. Also, the nearest words can be complements of this preposition. For example, nouns such as *university*, *college* and *school* are neighbors of *in* in the sense of ProfessionAspect.

The senses of *with* are listed in Table 10. A nearest neighbor of the sense MeansName is *using*, and based on this the phrase “treatment with laser” can be rewritten as “treatment using laser”. A nearest neighbor of sense Accompanier is *alongside*, and “partner with systems integrators” can be understood as “partner alongside systems integrators”. *Against* is synonymous to the sense Opponent, and “collided with a bus” can be paraphrased as “collided against a bus”. Besides semantically similar words, governors and complements also tend to occur as nearest words. *Interviewing* is a governor in “interviewing me with questions”, and is one neighbor of sense Message. *News* is a complement in “contact me with recent news”, and also close to *of*’s sense Message.

These tables of sense representations show us that preposition sense-specific embedding carries non-trivial lexical semantics. The nearest neighbors listed serve as a qualitative evaluation of these representations in that semantically-similar words are included as nearest neighbors. Thus, the nearest neighbors

|               |                                                      |                                                                 |                                                               |                                                                    |
|---------------|------------------------------------------------------|-----------------------------------------------------------------|---------------------------------------------------------------|--------------------------------------------------------------------|
| sense number  | 0                                                    | 1                                                               | 2                                                             | 3                                                                  |
| closest words | pair, featuring, twisted, assorted                   | using, stacked, resembling, molded, mechanically, adding        | signed, contract, professional, manager, career, full-time    | switches, microphones, setup, installing, radios, audio            |
| example       | rumble with bare hands, nudged Graham with her elbow | healed them with our doctor 's hand, treatment with laser       | stint with Somerset, manager with The Northern Echo           | a wooden cart with small wheels, the envelope with her resignation |
| TPP sense     | MeansName                                            | MeansName                                                       | Employer                                                      | Accountrement                                                      |
| sense number  | 4                                                    | 5                                                               | 6                                                             | 7                                                                  |
| closest words | scholar, studies, professor, doctoral                | treasurer, leader elected, deputy                               | while, alongside, mutual, befriend, interpersonal             | community, voluntary, facilitate, implementing                     |
| example       | studies literature with the Open University          | the value of benefits rises with income, fantastic with the day | partner with systems integrators, conspire with enemy         | complied with their obligation, conform with the legislation       |
| TPP sense     | Partner                                              | Coresultant                                                     | Accompanier                                                   | Harmonizer                                                         |
| sense number  | 8                                                    | 9                                                               | 10                                                            | 11                                                                 |
| closest words | express, emotional, jealousy, fearful                | against, teammate, throwing, punching                           | news, reporter, press, interviewing, announcing               | collar, wears, shoulders, waist, belly, neck                       |
| example       | glistened with dew, shimmers with crystals           | the showdown with his father, collided with a bus               | contact me with recent news, interview me with questions      | people with disabilities, a lady with a pale face                  |
| TPP sense     | FeatureCause                                         | Opponent                                                        | Message                                                       | Attribute                                                          |
| sense number  | 12                                                   | 13                                                              | 14                                                            |                                                                    |
| closest words | mutual, mutually, resulting, when, thus, meanwhile   | symptoms, prognosis, syndrome, abnormalities                    | dazed, furiously, relentlessly, taunt                         |                                                                    |
| example       | reason with her, compatible with autonomy            | woke with a heavy head, awoke with a start                      | forecast with certainty, express it with passionate intensity |                                                                    |
| TPP sense     | Concomitant                                          | Malady                                                          | Manner&Mood                                                   |                                                                    |

Table 10: Senses of preposition *with*.

can be treated as ‘definitions’ of the specific preposition sense. We also find that these nearest words include governors and complements of the given preposition.

## A.2 Preposition senses aid paraphrasing

In the experiment on phrasal verb paraphrasing, we use the global preposition embedding, the simplex verb embedding and our sense-specific preposition embedding to approximate the representation of phrasal verbs. For a given phrase, the nearest verbs of the phrasal representation are used (excluding the verb in the phrase) as its paraphrase.

For each approximate phrasal embedding ( $v_{vp}^{sense}$ ,  $v_{vp}^{global}$ ,  $v_{vp}^{simplex}$ ), we list the nearest three verbs (excluding the verb in the phrase) as candidate paraphrases. Here, distance is measured in terms of the cosine similarity between the word vectors.

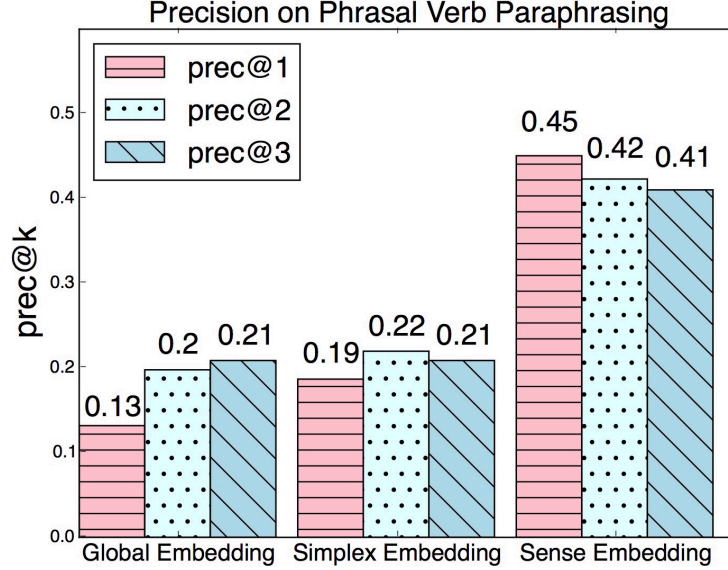

Figure 2: Precision on phrasal verbs paraphrasing.

Since we listed the top three candidate paraphrases for a phrasal verb and consider which of them are valid, we choose the metric of precision at  $k$  (prec@ $k$ ), defined as:

$$\text{prec@k} = \frac{1}{N} \sum_{i=1}^N \text{Precision}(i, k),$$

where  $N$  is the number of phrasal verbs, and  $\text{Precision}(i, k)$  is the percent of good paraphrases among the top  $k$  paraphrases for phrase  $i$ . The precision metrics for each method are reported in Fig. 2. As we can see, our sense-specific preposition embedding has a significantly better performance than global and simplex embeddings, in terms of all the three prec@1, prec@2 and prec@3 metrics.

We notice that paraphrasing is closely related to the nature of phrasal verbs. A three way classification of phrasal types is adopted in (Dehé, 2002; Jackendoff, 2002; Emonds, 1985; Villavicencio, 2006), where verb particle compounds (VPC) are classified into compositional, idiomatic or aspectual. For the compositional VPCs, the meaning of the construction is determined by the literal interpretations of the particle and the verb (e.g., throw out). Idiomatic VPCs, however, cannot have their meaning determined by their component words (e.g., *get through* meaning ‘manage to deal with’). The third class, aspectual VPCs, have the particle providing the verb with an endpoint, describing the action in more detail (e.g., tear up).

In the investigation described here we focus on compositional and aspectual VPCs. Verb particle compounds (VPC) are classified into three types based on the semantic relation between phrases and component words (Villavicencio, 2006):

1. Compositional: the phrasal meaning is determined by the literal interpretations of the verb and the particle;
2. Aspectual: the particle provide the verb with an endpoint, suggesting that verb action is performed thoroughly;
3. Idiomatic: phrasal meaning can not be inferred from the literal meaning of its component words.

The dataset of English phrasal verbs consisted of 91 phrases, in which there were 54 compositional phrases, 16 aspectual phrases and 21 idiomatic phrases in our dataset. Here we report the precision@k (k=1,2,3) of different methods on these three types of verb phrases respectively.

As is shown in Table 11, the precision of paraphrasing with preposition sense embedding is higher than those of the baselines with the global preposition embedding and simplex verb embedding on all three types of phrases. As we can see from the table, the precision improvement of sense embedding over global embedding is larger on aspectual phrases than on compositional phrases. The reason could be that the preposition plays a more important semantic role in aspectual phrases than in compositional phrases.

We also observe that the precision achieved by the simplex embedding is close to the precision by global embedding. It could be interpreted to mean that the preposition global embedding does not capture the semantic information of prepositions.

**Sense embeddings outperform simplex** ones in instances where: (a) prepositions are important in aspectual phrases (where the particle provides the verb with an endpoint, suggesting that the action described by the verb is performed completely, thoroughly or continuously), e.g., “go against”; (b) prepositions disambiguate the verb, e.g., “carried” has multiple senses: (i) support the weight of something; (ii) assume or accept (responsibility or blame). In vector representation, “carried” is close to “laid”, “wiped” and “phased”, while sense “on” drives “carry on” closer to “conducted”.

**Sense embeddings outperform global** ones since the latter only represent the semantics of dominant sense while sense embedding is better at capturing the true sense. For example, the global embedding of *down* is close to *destroyed* and *crashed*, and thus in phrase *put down*, global method gives paraphrases such as *slammed* and *snapped*. Sense embedding provides its sense of “downward direction”, and gives the paraphrases *laid* and *tossed*.

**Sense embeddings encode phrasal verb semantics** even though the preposition in the phrasal verb has lost its functional aspect; we see that computationally (and in a vector space), the sense-tagged preposition remains inside a phrasal verb. This is more pronounced in compositional phrasal verbs and in aspectual ones, and less so in idiomatic ones (Villavicencio, 2006).

we also observe that the precision ranking for phrase types are:

Compositional > Aspectual > Non-compositional.

| phrase type | Compositional |         |       | Aspectual |         |       | Idiomatic |         |       |
|-------------|---------------|---------|-------|-----------|---------|-------|-----------|---------|-------|
|             | global        | simplex | sense | global    | simplex | sense | global    | simplex | sense |
| prec@1      | 0.125         | 0.232   | 0.482 | 0.0625    | 0.0625  | 0.5   | 0.190     | 0.143   | 0.333 |
| prec@2      | 0.196         | 0.277   | 0.429 | 0.125     | 0.0625  | 0.406 | 0.238     | 0.167   | 0.429 |
| prec@3      | 0.220         | 0.268   | 0.417 | 0.188     | 0.042   | 0.438 | 0.190     | 0.159   | 0.381 |

Table 11: Precision on verb phrase paraphrasing.

In addition, we find that the paraphrasing of compositional or aspectual phrasal verbs is better than that of idiomatic ones. This is because in the case of the idiomatic phrasal verbs, the component words do not give much information about the semantics. Hence the sum of components is not a good approximation of an idiomatic phrasal verb representation.

Empirically we observe that a phrasal verb approximation using addition of verb and preposition sense gives good paraphrasing mainly in the following cases:

1. The verb dominates the phrasal meaning, e.g., focus on (~ focus), carry in (~ carry);
2. The preposition dominates the phrasal meaning, e.g., go against (~ against), keep from (~from, one sense of 'from' is close to 'stop' and 'prevent');
3. The verb is polysemous, and the preposition helps disambiguate the verb. For example, 'headed down' where the verb 'headed' has two senses: 'chaired/led' and 'approached'. The phrase 'headed down' prompts that 'headed' should have the sense 'approached'.
