# Supplementary material
Source: ML conference proceedings conference paper supplement (https://aclanthology.org/D18-1180)
Supplement: Attachment [file vp_paraphrasing_annotator_1.xlsx]

## Sheet: Sheet1
sentences			verb phrase	paraphrase (sense embedding)			rating (1: yes, 0: no)			verb only (simplex)			rating (1: yes, 0: no)			paraphrase (global embedding)			rating (1: yes, 0: no)
sent 1	sent 2	sent 3	vp	top 1	top2	top3										top 1	top2	top3
The teaching is carried <b> on </b> in the form of folklore and tribal legends .	The solution being put forward is that a member of the RICS may only carry <b> on </b> practice as a surveyor through the medium of a company -LRB- limited by shares or unlimited -RRB- provided that he complies with the new conditionally approved regulations .	When the money for Dr . La Rue 's post at the museum runs out later this year , there will be no-one to carry <b> on </b> her research and restoration work .	carried on	conducted	undertaken	laid	1	1	0	laid	wiped	phased	0	0	0	placed	lifted	laid	0	0	0
WITH nearly --CNUMB-- years of trouble-free driving behind me , I was relatively confident and assured when I switched <b> on </b> the ignition for my --ONUMB-- lesson in advanced driving .	Rihand belongs to a cluster of --CNUMB-- power stations which , when the lights are switched <b> on </b> , will have the highest concentration of power generation in the world .	Without a word he leaned forward and switched <b> on </b> the engine .	switched on	starting	dropped	swapped	1	0	0	reverted	swapped	dropped	0	0	0	shifted	droped	resumed	0	0	0
Some solvent misusers may absorb the product onto a rag -LRB- which they carry <b> in </b> their pocket -RRB- or onto a piece of their clothing .	In Nina 's stories it is Modigliani who was pushed off the bench , made to carry the beer <b> in </b> for a party .	She unloaded the car and carried everything <b> in </b> , dumping it all in the middle of the salon .	carried in	pulled	thrown	dragged	0	0	1	laid	wiped	phased	0	0	0	laid	conduted	brought	0	0	1
Anyone finding them should hand them <b> in </b> at a police station or to any officer he said .	On any day there was a great advantage in arriving at the Board of Trade early , for people were called up in the order in which they handed <b> in </b> their cards .	On June --CNUMB-- Israel Galeano , the '' contra '' military chief known as Commander Franklyn , and --CNUMB-- of his soldiers handed <b> in </b> their weapons to UN forces in a formal act marking the end of --CNUMB-- years of civil war .	handed in	took	transferred	stripped	0	1	0	taken	turned	stepped	0	0	0	took	transferred	stripped	0	1	0
your face and kick you <b> in </b> the teeth	I have certainly been kicked <b> in </b> the teeth by those Whaddon bastards .	And they are looking into an incident last month when Daum angrily kicked <b> in </b> an advertising board .	kicked in	knocked	grabbed	pulled	1	0	0	knocked	pulled	bounced	1	0	0	threw	knocked	broke	0	1	1
When she left the branch she actually locked him <b> in </b> , using a special procedure which takes a few seconds . ''	It seems to me highly likely that the killer had locked himself <b> in </b> and that he got away during that --CNUMB-- minutes . ''	They are much more risky , tending to be highly volatile rising quickly but often falling faster , indeed sometimes trading is suspended for a few days so you are locked <b> in </b> until trading resumes usually at a much lower level .	locked in	chained	handcuffed	sealed	0	0	1	chained	trapped	dragged	0	1	0	sealed	closed	hiding	1	1	0
If you are writing to your mother , do not forget to put <b> in </b> something about her coming to stay .	While he mulled over his future , Rudd gradually sorted out the handling so that by July --CNUMB-- the Type --CNUMB-- was good enough for Hill to put <b> in </b> a brilliant performance in the British Grand Prix , clawing his way into the lead after losing a --ONUMB-- of a lap through stalling on the grid .	It was quite a new idea over here , you did n't do your washing at home but brought it out to these machines , and the courteous manager greeted you and put <b> in </b> the soap powder for you , and had the clothes all ready for you when you came back , but was n't alas , as it turned out , much of a hand at doing the accounts .	put in	brought	dragged	crept	0	0	0	came	put	turned	0	1	0	brought	turned	broke	0	0	0
`` The roof was smashed <b> in </b> and one door was open , but we could not get him out .	Its china face was smashed <b> in </b> , and one blue eye had disappeared .	He wanted to smash William 's teeth <b> in </b> , he wanted to kick him all round the airfield .	smashed in	hurled	shattered	flung	0	1	0	hurled	slammed	thrown	0	0	0	burned	thew	dragged	0	0	0
Hal and i flew <b> over </b> to italy to visit the ghia studios in turin, where we met with alejandro detomaso, the studio head .	A few months into my new job, i flew <b> over </b> to germany to check on the progress on mcnamara's car .	Your mission is to fly <b> over </b> horizontally scrolling enemy territory , hitting the space bar to bomb the target -LRB- bridge , fort etc	flew over	circled	crossed	circling	0	1	0	piloted	crashed	landed	0	0	0	crashed	landed	piloted	0	0	0
What good businessman would hand <b> over </b> even the engagement dower without signing and sealing a contract ?	They must establish that all the proper procedures for handing <b> over </b> the firearm were strictly adhered to .	The building and the organization were handed <b> over </b> to the new body of Guardians of the Bedford Poor Law Union , on November --CNUMB--th --CNUMB-- .	handed over	seized	passed	wrested	0	1	0	taken	turned	stepped	0	0	0	reins	left	flipped	0	0	0
Althusser thus suggests that history can only be thought <b> through </b> as a permanent contradiction : it is a totality , but that totality is a decentred structure in dominance in which each history 's history is defined not through its identity with , or difference from , a general history but by being differentiated from every other history , on which it is necessarily also therefore depende…	Reasons can assist the courts in performing their supervisory function , can help to ensure that the decision has been thought <b> through </b> , and can aid in the control of administrative discretion .	It is saying , and I think everyone agrees , do n't abolish this until you 've thought it <b> through </b> and either provided an alternative or done it again in a different way . ''	thought through	believed	understood	considered	0	0	1	believed	seems	understood	0	0	0	believed	realzed	suggesting	0	0	0
There is no reason why this track should be any worse than the '' effort '' track except that I have chosen to block <b> off </b> the easy track and so turn it into a dead end .	One day the inspiration came : why not block <b> off </b> any such potential assault vehicles , as well as bomb-laden or armed individuals , before they get half-way down the street ?	Machines that are considered `` out of the way '' in a corner of the room will be relatively more unsociable if they block <b> off </b> a doorway or interrupt television viewing .	blocked off	stopped	dislodged	jammed	1	0	0	cleared	impeding	obstructed	0	0	0	cleared	stuck	smashed	0	0	0
Indeed , it reinforces the status quo , closes <b> off </b> discussion and analysis , and restricts rather than expands popular consciousness .	The `` space '' which once existed for police and pickets to negotiate a mutually acceptable code of picket-line conduct has been closed <b> off </b> , as the miners and striking print workers discovered to their cost .	But try and get them to change now , in fact York seems to be finding more excuses for closing <b> off </b> streets all the time .	closed off	stopped	dismantled	shuttered	1	0	0	reopened	opened	demolished	0	0	0	cleared	blocked	reopened	0	1	0
But City are prone to concede goals in the last quarter of an hour and bang on the --CNUMB--th minute the impressive young Dodd fed a wonderful --CNUMB---yard pass to Rod Wallace , who held <b> off </b> --CNUMB-- defenders to equalise .	Francis Place was the very type of the journeyman striver after independence and status , but he held <b> off </b> less reputable associations at only arm 's length .	We can try to hold them <b> off </b> with our blasters .	held off	exited	paused	stopped	0	1	1	contested	organised	hosted	0	0	0	exited	paused	stopped	0	1	1
'' It 's a long way for him to come every time he wants a crap , said Eddie , running <b> off </b> before I could hit him .	ESSEX police are hunting a motorist who ran <b> off </b> after the stolen car he was driving overturned .	She ran <b> off </b> screaming but she never pulled faces at us again if Dad was around .	ran off	exited	fleed	slipped	1	1	0	drove	stood	broke	0	0	0	exited	fleed	slipped	1	1	0
One plate slides under another , scraping <b> off </b> rocks and generating volcanic activity on the overlying plate .	`` That 's the same shit they used on you the Doctor analyzed some of it he scraped <b> off </b> the stones you 'd been handling . ''	They are grazing carnivores using a --NOUN---like tongue to scrape <b> off </b> the flesh of the unfortunate prey .	scraped off	smashed	shreds	pounded	0	0	0	peeled	rubbed	chipped	0	0	0	stuck	peeled	cut	0	0	0
Turn the bag inside out , shake <b> off </b> the surplus moisture and replace the bag inside-out on the canes .	Meanwhile , Premier League leading scorer Alan Shearer looks certain to shake <b> off </b> the leg injury that cut short his --CNUMB---goal displayf against Leeds on Boxing Day in time for Blackburn 's visist to Ipswich today .	United have just about shaken <b> off </b> the flu bug and are back to more or less full strength .	shook off	smashed	slammed	blows	0	0	0	rocked	blew	tore	0	1	0	smashed	slammed	jumped	0	0	0
The Rishon Le Zion killings sparked <b> off </b> a wave of sympathy protests in Jordan , particularly in the Palestinian refugee camps outside Amman and Irbid .	There are many more than --CNUMB-- but I would certainly say they include my grandmother Sarah Howells , and Rosa Parks , the black American woman whose protest sparked <b> off </b> the civil rights movement in the United States during the --CNUMBs-- when she refused to move from a whites-only seat on a bus .	An English army under John Lord Neville landed in Brittany in October --CNUMB-- , but its arrival sparked <b> off </b> a reaction against the duke by many of his subjects	sparked off	ensued	causing	prompting	1	1	1	spurred	prompted	reignited	1	1	0	ignited	triggered	caused	1	1	1
The final procedure was to split <b> off </b> the component from the scrap and clean up .	Furthermore , this structure is split <b> off </b> from the actual social structure they carry `` in their minds '' and which they internalise from their own culture	Klein suggests that `` The process of splitting <b> off </b> parts of the self and projecting them into objects are thus of vital importance for normal as well as for abnormal object relations .	split off	splintered	divided	halves	1	1	1	merge	divided	splintered	0	1	1	halves	slammed	break	1	0	1
Beyond a certain point however , the amount of improvement tailed <b> off </b> with increase in context .	Similarly , if we want the food supply to tail <b> off </b> in September , the last application must be spread during June .	Over-optimism at the Treasury Through the summer , the signs of a slowdown in domestic demand had come reasonably on cue : the inflation figures duly peaked , retail sales tailed <b> off </b> , even labour costs did not accelerate as fast as feared .	tailed off	grabs	reduced	distracted	0	1	0	tipped	reeled	fending	0	0	0	footed	eared	spotted	0	0	0
Fears of a global recession affected international stock markets in September , and London share prices hit their lowest closing level since January --CNUMB-- when $ --CNUMB-- --CNUMB-- were wiped <b> off </b> the value of companies listed in London .	But as , presumably , they had been wiped <b> off </b> the face of the earth by someone pretty close to Ella Walsh or Rose Fox , there seemed little point in asking about them .	She was wiped <b> off </b> and left hanging by branches .	wiped off	overpowered	smashed	panicked	1	1	0	decimated	annihilated	carried	1	1	0	tapped	destroyed	smashed	0	1	1
Dennis Bond wrote in his `` chronology '' in --CNUMB-- : `` The --CNUMB--th December there was such a wind that it did blow <b> down </b> divers houses and several woods .	The wind blew <b> down </b> the tents of the other lads he had joined in camping on an apparently sheltered spot in a hollow above the sea .	In Ilford , it cries kebabs , burgers , and the stink of greasy takeaways blowing <b> down </b> the High Road .	blew down	smashed	snapped	slammed	0	1	0	ripped	holed	tore	1	0	1	tripped	caught	slammed	0	0	0
There 's usually a heavy-metal band sitting in one comer , their van 's broken <b> down </b> , you see , and they 're on their way to an important gig .	But in some regions the pattern appears to break <b> down </b> -LRB- Table --CNUMB-- -RRB- ; notably in Southeast England , on the North Coast of Wales , in the Solway Firth and , most spectacularly , in the Severn Estuary .	In order to study the growth rates in more detail , the data were broken <b> down </b> into annual figures , -LRB- See Table --CNUMB-- -RRB- .	broke down	smashed	snapped	blew	0	0	0	hurled	slammed	thrown	0	0	0	dragged	threw	snapped	0	0	0
Traffic lights throughout Seaham were thrown into chaos yesterday after a heavy goods vehicle hit a post on the Times Inn bank , bringing <b> down </b> an electricity cable .	Woodfall , the company set up by Tony Richardson and John Osborne to exploit the profits from Look Back in Anger , with the aim of proving `` that good films , ones that showed British life as it really is , could be made cheaply '' , nevertheless had no particular strategy for trying to bring <b> down </b> the budgets of films from the $ --CNUMB-- or so they were costing to the $ --CNUMB-- level…	A --CNUMB-- % cut in benefits brings <b> down </b> his expected duration by only --CNUMB-- weeks .	brought down	pushed	reduced	crushed	0	1	1	came	put	turned	0	0	0	dragged	pushed	threw	0	0	0
Most property shares were marked <b> down </b> , although selling was not heavy .	Though the invisible trade surplus has been marked <b> down </b> , there was encouraging news for the Government yesterday on the visible trade deficit .	Brussels : Chemicals was the only sector to show resilience as prices were marked <b> down </b> in thin business .	marked down	signaled	followed	squashed	0	0	0	coincided	signaled	heralded	0	0	0	end	put	read	0	0	0
He put <b> down </b> a newspaper he had been glancing at .	She put <b> down </b> the phone and turned back to Jamie .	Stanley put <b> down </b> his paper and glared at her .	put down	laid	thrown	tossed	1	0	0	brought	bring	turned	0	0	0	slammed	snapped	dragged	0	0	0
Robyn demanded , slapping <b> down </b> her wine glass on to the table .	Daniel slapped <b> down </b> a florin on the counter and caught the landlord 's eye .	Barfield describes how he read this sentence , slapped <b> down </b> the book and shouted : `` I do n't believe it !	slapped down	struck	hit	slammed	1	1	1	shoved	spat	punched	1	0	0	yelling	grabbed	slammed	0	0	1
But the European Commission has so far shown no signs of stopping or even slowing <b> down </b> the HDMAC development program .	its time to slow <b> down </b> --- time to head for the river bank --- and go fishing for our Friday Feature	This tends to slow <b> down </b> the body 's metabolic rate , and for that reason weight-loss diets should have plenty of protein .	slowing down	stalling	stopped	stopping	0	0	0	shutting	accelerating	accelerates	0	0	0	stopped	stopping	lowering	0	0	1
women feel that they should fit <b> in </b> with what is ` normal and natural ' , meaning that they chose to have children .	The house is not big , but it fits <b> in </b> with our needs .	This fitted <b> in </b> well with the approach of our hosts .	fit in	conform	adapt	conforming	1	0	1	look	conform	adjust	0	1	0	incorporate	conform	satisfy	0	1	1
he brought <b> in </b> new ideas in the discussion this morning .	Experts were brought <b> in </b> to advise the government .	It is they who bring <b> in </b> the music to california .	brought in	introduced	led	put	1	1	1	came	put	turned	0	1	0	came	led	turned	0	1	0
it is also often used to pay for the preliminary work involved <b> in </b> making applications for civil and criminal legal aid .	She was involved <b> in </b> working out a puzzle .	Another concept involved <b> in </b> our picture of matter is weight .	involved in	engaged	embroiled	enmeshed	1	0	1	interested	engaed	embroiled	1	1	0	participating	engaged	concerned	1	1	0
If you invest <b> in </b> a rental property, there are many responsibilities that come along with being a landlord .	I am thinking of investing <b> in </b> a new car .	What are the risks of investing <b> in </b> exchange fund notes .	invest in	bought	buy	buying	1	1	1	acquire	sell	buy	1	0	1	diversify	acquire	divest	0	1	0
he accused her <b> of </b> stealing the money .	he was accused <b> of </b> having been in the pay of pougatcheff .	The union leaders were accused <b> of </b> selling out to the employers .	accuse of	denounce	criticize	condemn	1	1	1	denounce	criticize	condemn	1	1	1	allege	denounce	assert	0	1	0
the royal council in 1564 refused to approve <b> of </b> the publication of the acts of the council of Trent .	I quite approve <b> of </b> the idea of your plan .	We all approve <b> of </b> the commission of authority to him .	approved of	authorized	proposed	endorsed	1	0	1	authorized	submitted	finalized	1	0	0	mandated	proposed	submitted	0	0	0
the more i thought about it, the more i was convinced <b> of </b> the incredible scope of howie's gift	We were convinced <b> of </b> the righteousness of our cause .	They are convinced <b> of </b> the singularity of their good taste .	convinced of	believing	intrigued	persuaded	1	0	0	persuaded	believing	insisted	0	1	0	urged	persuaded	wished	0	0	0
when i was young , i dreamed <b> of </b> becoming a doctor .	Yet he dreamed <b> of </b> it, and stuck to his dreams .	She had always dreamed <b> of </b> appearing opposite olivier .	dreamed of	adored	aspired	longed	0	1	1	remembers	enamored	knew	0	0	0	beheld	imagined	contented	0	1	0
i sometimes despair <b> of </b> getting anything quite simple and honest done in this world by the help of men .	The doctors despaired <b> of </b> it from the start .	If that were broken, i should despair <b> of </b> the immediate future .	despair of	anguish	grieve	utter	1	1	0	anguish	grieve	torment	1	1	0	utter	lamenting	longing	0	1	0
such a robot would allow <b> for </b> both long-term studies of ant-robot interactions and studies of task-switching in the robots .	This template allows <b> for </b> slight song variations .	Unstable employment and high turnover do not allow <b> for </b> the accumulation of experience .	allow for	enable	require	facilitate	1	0	1	enable	require	required	1	0	0	permit	require	provide	1	0	0
we are exhorted to pray <b> for </b> others - including our country's leaders, our authorities at work and elsewhere, our church leaders, our co-workers, friends, and family .	Blessed virgin, pray <b> for </b> the death of this fish .	He could walk up and down, free from distracting fancies, praying <b> for </b> himself and for them .	pray for	bless	repent	rejoice	0	0	0	venerate	bless	rejoice	0	0	0	blessing	rejoice	prepare	0	0	0
preparing <b> for </b> a party with extra time is the best way to guarantee that you'll have a relatively hassle-free birthday party after .	I have had no time to prepare <b> for </b> this meeting , so i will have to play it by ear .	He looked on with delight and wonder whilst ophelia busied herself about the room, and prepared <b> for </b> dinner .	prepared for	arranged	provided	advised	1	0	0	instructed	advised	recommended	0	0	0	provided	recommended	required	0	0	0
the silly criticisms of the scene obscure the real obscenity of the situation : a bank handing out guns to its customers , higlighting the utter laxness of how americans deal <b> with </b> deadly weapons and a love of firearms that borders on the religious .	This book deals <b> with </b> deterministic systems .	They dealt <b> with </b> the problem in a purposeful way .	dealt with	faced	confronting	addressed	1	1	1	preoccupied	concerned	grappled	0	0	1	faced	involving	treated	1	0	1
he believes investors should adjust their convictions as the environment around them changes , but always be sure to stick <b> with </b> your idea and always be right .	I am sticking <b> with </b> my original idea .	Nixon said little, and what he said was ambiguous-a sure sign to anyone familiar with his methods that he meant to stick <b> with </b> his decision .	stuck with	attached	sharpened	strung	0	0	0	trapped	sucked	choked	0	0	0	dragging	squashed	pulling	0	0	0
how did muslim fundamentalism emerge <b> from </b> and influence political developments after 1945 ?	Many technical innovators have emerged <b> from </b> the workers .	Consensus did not emerge <b> from </b> a compromise between individual preferences .	emerged from	evolved	formed	arose	1	1	1	arose	re-emerged	evolved	1	0	1	dominated	migrated	arose	0	0	1
this special dress is made <b> from </b> silk .	Wine is made <b> from </b> grapes .	Most of the drugs listed on the tables were made <b> from </b> plants .	made from	created	produced	rendered	1	1	0	give	get	keep	0	0	0	kept	removed	created	0	0	1
his confidence is derived <b> from </b> years of experience .	Certain generalizations can be derived <b> from </b> the data in table 6 .	The two attitudes derive <b> from </b> different historical perspectives .	derived from	originates	originated	refers	1	1	0	originates	originate	differs	1	1	0	borrowed	originate	originates	0	1	1
the music distracted him <b> from </b> his work .	The noise out of window makes me distract <b> from </b> my reading .	And he was being distracted <b> from </b> his project .	distract from	lure	frighten	entice	0	0	0	dissuade	lure	frighten	0	0	0	conceal	avoid	deflect	0	0	0
i will not resign <b> from </b> my job .	They are intending to resign <b> from </b> the committee .	She has resigned <b> from </b> the government .	resign from	withdraw	relinquish	vacate	0	1	0	retire	withdraw	relinquish	0	0	1	retire	withdraw	abdicate	0	0	1
i hope i recover <b> from </b> this cough soon .	Mary had recovered <b> from </b> her faint and was lying on the bed .	Trade soon recovered <b> from </b> the effects of the war .	recover from	recuperate	heal	healed	1	1	1	regain	retrieve	reclaim	0	0	0	regain	reclaim	retrieve	0	0	0
i horse around quite a lot , just to keep <b> from </b> getting bored .	I had to keep <b> from </b> being crushed, to fend off continuous attack .	She could not keep <b> from </b> crying, and sat down weak and agitated on the first chair she could find .	keep from	avoid	hide	restrain	1	0	1	get	maintain	make	0	0	0	maintain	removed	prevent	0	0	1
i knocked <b> over </b> a can of paint and spent the next hour cleaning up .	Be careful . you almost knocked <b> over </b> my cup .	He knocked <b> over </b> a bottle of ink and ruined the table cloth .	knocked over	beaten	jumped	snapped	0	0	0	pulled	thrown	kicked	0	0	1	thrown	beaten	pulled	0	0	0
Babies often fall <b> down </b> when they are learning to walk .	When you were learning to skate, you probably fell <b> down </b> many times .	It would probably have fallen <b> down </b> if we'd all sneezed at it together .	fell down	slipped	slid	tumbled	0	0	0	slipped	plunged	jumped	0	0	0	collapsed	slammed	dragged	0	0	0
Everything was left <b> behind </b> except food and a few cooking utensils .	His wife left <b> behind </b> her two little girls .	In the process of translation, we have left <b> behind </b> some of the original data .	leave behind	hide	abandon	betray	0	1	0	stay	return	depart	0	0	0	stay	hiding	flee	0	0	0
The teacup was broken <b> into </b> pieces .	In fact, you can execute much larger programs as long as the larger program can be broken <b> into </b> blocks .	The glass fall to the floor and break <b> into </b> fragment .	broke into	pulled	tore	blew	0	0	0	pulled	tore	turned	0	0	0	dragged	needed	collapsed	0	0	0
The young nurse had come <b> into </b> the room quietly .	He came <b> into </b> the room and confessed everything .	One and all, they came <b> into </b> the room .	come into	confront	go	enter	0	0	1	go	bring	get	0	0	1	turn	vanish	disappear	0	0	0
I will account <b> for </b> this state of affairs .	The purpose of the theory is to account <b> for </b> these experimental findings .	And the heat would accounted <b> for </b> the fact that you're hard-boiled .	account for	detailed	described	considered	1	1	0	eye-witness	details	recounting	0	1	0	summarize	justify	concern	0	1	0
He had been too proud to ask <b> for </b> help .	Do n't scruple to ask <b> for </b> anything you want .	We were not asking <b> for </b> any gifts .	asked for	requested	gave	needed	1	0	0	instructed	requested	wanted	0	1	0	replied	requested	required	0	1	0
In those years he just fought <b> for </b> fame .	It is better to fight <b> for </b> good than to rail at the ill .	The artist must elect to fight <b> for </b> freedom or slavery .	fight for	defend	duel	retaliate	1	0	0	duel	battling	bout	0	0	0	prepare	defend	save	0	1	1
It was ill going <b> against </b> a mother's instinct .	His thinking goes <b> against </b> all logic .	Teenagers often go <b> against </b> the stream .	go against	punish	confront	oppose	0	1	1	get	come	stay	0	0	0	fight	defend	stop	1	0	0
He enlisted with the air force to fight <b> against </b> the enemy .	His whole life is a fight <b> against </b> poverty and unemployment .	They have had to wage a continual despairing fight <b> against </b> the rise of prices .	fight against	attacking	confront	oppose	1	1	1	duel	battling	bout	0	0	0	defeat	attacking	resist	0	1	1
A trained dog can act <b> as </b> a guide to a blind person .	The bush acted <b> as </b> a cushion to my falling .	He acted <b> as </b> pioneer in proposing the method .	acted as	functioned	worked	became	1	1	0	worked	served	functioned	1	1	1	subordinate	appointing	detested	0	0	0
From a seaplane we can see <b> down </b> into the water .	Vegetation, stones, houses and the most important thing a capital, as you can see <b> down </b> on the right side, to give depth to the scene .	I could see far <b> down </b> into caverns of pale pink throat .	see down	note	stare	link	1	0	0	refer	stare	reading	0	0	0	link	bottom	stop	0	0	0
You stupid jerk! You've just spilled beer all <b> down </b> my new shirt .	I spilled coffee <b> down </b> my silk shirt .	You've spilled something <b> down </b> your tie .	spilled down	drenched	leak	pouring	0	0	1	poured	sprayed	tossed	1	1	0	slammed	smashed	grabbed	0	0	0
A small crowd attempted to pull <b> down </b> a statue .	It is easier to pull <b> down </b> than to build up .	They'd pulled <b> down </b> the registry office which then left an open space .	pulled down	smashed	snapped	slammed	1	0	0	knocked	slipped	dragged	1	0	0	snapped	slammed	smashed	0	0	1
Why do n't you go upstairs and lie <b> down </b> for a bit ?	Let us lie <b> down </b> for a rest .	Lie <b> down </b> on your bed and make yourself comfortable .	lay down	kneel	tripped	halt	0	0	0	sit	dragged	dug	0	0	0	slammed	crumpled	dug	0	0	0
I watched him step <b> off </b> the pavement, cross the street, and disappear into the post office .	It 's time to step <b> off </b> the treadmill and get into nature to squeeze in a little exercise .	Often I'd find my way blocked by boys and be forced to step <b> off </b> the pavement .	stepped off	pulled	slid	slipped	0	0	0	turned	shut	pulled	0	0	0	pulled	jumped	slammed	0	1	0
Mountain torrents rush <b> down </b> from the cliff .	The van began to rush <b> down </b> the hill towards the traffic circle .	Then the water will not rush <b> down </b> to the river, and the humus will stay in its place .	rushed down	panicked	leaped	crawled	0	0	0	threw	jumped	hurried	0	0	1	slammed	stopped	smashed	0	0	0
If you have hyperextended knees, your heels will lift <b> off </b> the floor .	I felt an enormous weight lift <b> off </b> my shoulders .	ou should not feel like you're about to fall forward when you lift <b> off </b> the handle bar .	lifted off	slammed	stopped	dislodged	0	0	0	loosened	lowered	pulled	0	0	0	stopped	lowered	smashed	0	0	0
The bullet glanced <b> off </b> the tree and went through the window .	The bullet glanced <b> off </b> a tree and struck Bob .	The rain was louder as it glanced <b> off </b> my jacket .	glance off	bump	place	staring	1	0	0	hint	look	gaze	0	0	0	grab	lengthen	bottom	0	0	0
We stripped <b> off </b> our sodden clothes .	He hastily stripped <b> off </b> his old uniform and began pulling on the new one .	He stripped <b> off </b> his wet clothes and stepped into the shower .	stripped off	grabbed	dragged	dislodged	0	0	0	removed	handed	forfeited	1	0	0	smashed	dragged	pulled	0	0	0
She walked <b> off </b> the plane in a miniskirt and tight top .	He shouldered the loaded carrying pole and walked <b> off </b> with a swing .	Ryan was exhausted by the flight and walked <b> off </b> with wobbly legs to find Clark .	walked off	shoved	jumped	chased	0	0	0	threw	jumped	shoved	0	0	0	jumped	smashed	stuck	0	0	0
The curtain came <b> down </b> after the first act .	Clouds had come <b> down </b> and it was starting to drizzle .	Come <b> down </b> quickly, the ladder is unsteady !	came down	went	slipped	fell	0	1	1	brought	went	turned	0	0	0	slammed	stopped	fell	0	0	0
Move <b> over </b> and let me drive .	Move <b> over </b> and let your grandmother sit down .	Shut up and move <b> over </b> there ! Let 's go !	move over	push	turn	relocate	0	0	1	push	pull	relocate	0	0	1	turn	push	rotate	0	0	0
You're the first man to climb <b> down </b> that tree before climbing up it .	He walks along the wooden pier and climb <b> down </b> into the boat .	I climb <b> down </b> that ladder into my own hub of stillness .	climb down	descend	ascend	lift	1	0	0	ascend	reach	hike	0	0	0	ascend	jump	drop	0	0	0
Come <b> over </b> when you have time .	Why do n't you come <b> over </b> here tomorrow evening .	Would you be kind enough to come <b> over </b> to my place for a chat tomorrow ?	come over	disappear	go	bring	0	0	0	go	bring	get	0	0	0	gone	bring	continue	0	0	0
We hope this information can pass <b> down </b> to everyone. Let's take care of our environment with the same dedication and feelings .	They often use folksongs to pass <b> down </b> their history .	The creativity of poetry translation is also reflected in reading translated poetry, we can pleasingly get into an era in long ago time, or we can pass <b> down </b> our discoveries to era in far future .	passed down	handed	dragged	swung	0	0	0	enacted	repealed	handed	0	0	0	lifted	stopped	dragged	0	0	0
She rang <b> off </b> before I had time to ask her name .	Some person called last night but he rang <b> off </b> before I could answer the phone .	I have to ring <b> off </b> now . I have a train to catch .	rang off	grabbed	yelled	shouting	0	0	0	shouted	yelled	phoned	0	0	0	smashed	slammed	stopped	0	0	0
The caterpillars feed <b> on </b> a wide range of trees, shrubs and plants .	Larger fish and mammals that feed <b> on </b> the small fish also lose their food source .	Birds feed <b> on </b> worms and grains .	feed on	forage	eat	consume	0	1	1	forage	consume	eat	0	1	1	grubs	forage	regurgitated	1	0	0
The soup needs to cool <b> down </b> . It's too hot to eat .	Oceans only heat up and cool <b> down </b> very slowly .	If it is too hot or too cold, we burn calories to cool <b> down </b> or heat up .	cooled down	molten	vaporized	heated	0	0	0	heated	evaporated	warmed	0	0	0	molten	heated	pressureized	0	0	0
It 's about time you cast <b> off </b> that feeling of gloom and began to enjoy yourself .	He casts <b> off </b> fear and decided to make a try .	He was able to cast <b> off </b> such an uninteresting task .	casts off	shatters	crushes	grabs	0	1	0	plaster	mold	busts	0	0	0	smashed	slips	hitting	0	0	0
The Treasury has clamped <b> down </b> on public expenditure .	The police clamped <b> down </b> on illegal drugs .	Banks such as JPMorgan Chase and credit card groups such as American Express have clamped <b> down </b> on lending to customers that have traditionally been regarded among the safest and most profitable borrowers .	clamped down	buckled	slammed	jammed	0	0	0	fastened	bolted	glued	0	0	0	slammed	grabs	crumpled	0	0	0
As the lady stepped <b> down </b> from the carriage, the gentleman politely handed her out of the car .	The passengers stepped <b> down </b> gingerly from the narrow gangplank .	We stared some more and then he stepped <b> down </b> from the fence he was perched upon .	stepped down	slipped	bumped	pushed	0	0	0	turned	shut	pulled	0	0	0	slammed	snapped	slid	0	0	1
If the prisoner is sick, the warder calls <b> in </b> the prison doctor to treat him .	Call <b> in </b> an architect or surveyor to oversee the work .	I called <b> in </b> my dear wife, and told her what I had done .	calls in	prompts	yells	asks	0	0	1	responds	asks	prompts	0	1	0	phone	dialing	answering	1	1	0
A button has come <b> off </b> my coat .	The top has come <b> off </b> the bottle , and the wine is spilling out !	The tail wo n't come <b> off </b> the toy plane , it's fixed on with nails .	came off	stopped	jumped	slipped	0	0	1	brought	went	turned	0	0	0	stopped	proceeded	drove	0	0	0
Every one looked <b> on </b> me as a noble being .	We looked <b> on </b> her as a daughter .	He looked <b> on </b> her as treasure and missed her for long .	looked on	discussing	seemed	examining	0	0	0	seemed	felt	knew	0	0	0	touched	stood	put	0	0	0
Some of the guns were melt <b> down </b> and used to help build a statue .	Some thieves do not even bother to melt <b> down </b> stolen silver for its scrap value .	Many of the gold ornament will be melt <b> down </b> to be made Into coins .	melt down	evaporate	freezes	disintegrate	0	0	1	evaporate	cools	vaporize	0	0	0	deform	burn	shatter	0	0	0
Blend <b> in </b> the lemon extract, lemon peel and walnuts .	Blend <b> in </b> the eggs, one at a time, beating well after each one .	Melt the butter and then blend <b> in </b> the flour .	blend in	melding	infusing	mix	1	0	1	infused	melding	mix	0	1	1	melding	mixed	combining	1	1	1
I have quickly got <b> through </b> the novel in one evening .	They have efficiently got <b> through </b> the work as quickly as they could .	I have quickly got <b> through </b> so much work this morning .	got through	gave	came	receiving	0	0	0	came	forgot	came	0	0	0	going	stuck	hurry	0	0	0
Or , should we switch <b> over </b> to the screen option only ?	we can switch <b> over </b> to the class notes .	Are you going to switch <b> over </b> to being a reporter ?	switched over	shifted	reverted	swapped	1	0	1	swapped	reverted	dropped	1	0	0	dropped	ended	shifted	0	0	1
He stuffed the newspapers into a litter bin and headed <b> down </b> the street .	So she headed <b> down </b> to the local Social Security office right away .	Your brother is headed <b> down </b> a dangerous road, Dean, and we're not sure where it leads .	headed down	approached	proceeded	stopped	0	0	0	chaired	overseen	assisted	0	0	0	slammed	smashed	crumpled	0	0	0
The adventurer awoke to find himself tied <b> down </b> with long ropes to the ground .	But , like all the other buttons on the mattress , it was tied <b> down </b> tight .	And my hair, which was long and thick, tied <b> down </b> in the same manner .	tied down	grabbed	nailed	blindfolded	0	0	0	finished	notched	wins	0	0	0	snapped	fastened	slammed	0	1	0
China is most likely to fill the vacuum created by an American failure to lead <b> on </b> regional and Global trade .	And Americans who want to see their country lead <b> on </b> the energy and climate issues that are crucial to the world this century should want to be in the vanguard on carbon taxes .	But by their very nature , these entities can neither lead <b> on </b> price , nor drive systems improvements .	led on	prompted	instigated	provoked	0	0	0	resulted	prompted	culminated	0	0	0	prompted	culminated	resulted	0	0	0
